# Supplementary material
Source: HighWire-hosted journal article supplement (https://erj.ersjournals.com/content/55/6/2000351)
Supplement: inline-supplementary-material-2 [file inline-supplementary-material-2.pdf]

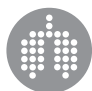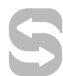

SHAREABLE PDF

# Withdrawal of inhaled corticosteroids in COPD: a European Respiratory Society guideline

James D. Chalmers<sup>1,14,15</sup>, Irena F. Laska<sup>1,15</sup>, Frits M.E. Franssen<sup>2,3</sup>, Wim Janssens<sup>4</sup>, Ian Pavord<sup>5</sup>, David Rigau<sup>6</sup>, Melissa J. McDonnell<sup>7</sup>, Nicolas Roche<sup>8</sup>, Don D. Sin<sup>9</sup>, Daiana Stolz<sup>10</sup>, Samy Suissa<sup>11</sup>, Jadwiga Wedzicha<sup>12</sup> and Marc Miravittles<sup>13,14,15</sup>

**Affiliations:** <sup>1</sup>School of Medicine, University of Dundee, Ninewells Hospital and Medical School, Dundee, UK. <sup>2</sup>Dept of Respiratory Medicine, Maastricht University Medical Center, Maastricht, The Netherlands. <sup>3</sup>Dept of Research and Education, CIRO, Horn, The Netherlands. <sup>4</sup>Clinical Dept of Respiratory Diseases, UZ Leuven and Breathe, Dept CHROMETA, KU Leuven, Leuven, Belgium. <sup>5</sup>Oxford NIHR Respiratory BRC, Nuffield Dept of Medicine, University of Oxford, Oxford, UK. <sup>6</sup>Iberoamerican Cochrane Center, Barcelona, Spain. <sup>7</sup>Galway University Hospital, Galway, Ireland. <sup>8</sup>Respiratory Medicine, Cochin Hospital, AP-HP Centre University of Paris, Cochin Institute (UMR1016), Paris, France. <sup>9</sup>Centre for Heart Lung Innovation, St Paul's Hospital and Respiratory Division, Dept of Medicine, University of British Columbia, Vancouver, BC, Canada. <sup>10</sup>Clinic of Respiratory Medicine and Pulmonary Cell Research, University Hospital, Basel, Switzerland. <sup>11</sup>Centre for Clinical Epidemiology, Jewish General Hospital and Dept of Epidemiology and Biostatistics, McGill University, Montreal, QC, Canada. <sup>12</sup>Airways Disease Section, National Heart and Lung Institute, Imperial College London, London, UK. <sup>13</sup>Pneumology Dept, Hospital Universitari Vall d'Hebron/Vall d'Hebron Research Institute, CIBER de Enfermedades Respiratorias (CIBERES), Barcelona, Spain. <sup>14</sup>Task Force co-chairs. <sup>15</sup>These three authors contributed equally to the development of this guideline.

**Correspondence:** Marc Miravittles, Pneumology Dept, University Hospital Vall d'Hebron/Vall d'Hebron Research Institute (VHIR), Passeig Vall d'Hebron 119–129, 08035 Barcelona, Spain. E-mail: marcmm@separ.es

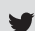

@ERSpublications

This ERS short guideline summarises the evidence and provides recommendations for ICS withdrawal in patients with COPD <https://bit.ly/33R3M5w>

**Cite this article as:** Chalmers JD, Laska IF, Franssen FME, *et al.* Withdrawal of inhaled corticosteroids in COPD: a European Respiratory Society guideline. *Eur Respir J* 2020; 55: 2000351 [<https://doi.org/10.1183/13993003.00351-2020>].

This single-page version can be shared freely online.

**ABSTRACT** Inhaled corticosteroids (ICS) combined with bronchodilators can reduce the frequency of exacerbations in some patients with chronic obstructive pulmonary disease (COPD). There is evidence, however, that ICS are frequently used in patients where their benefit has not been established. Therefore, there is a need for a personalised approach to the use of ICS in COPD and to consider withdrawal of ICS in patients without a clear indication. This document reports European Respiratory Society recommendations regarding ICS withdrawal in patients with COPD.

Comprehensive evidence synthesis was performed to summarise all available evidence relevant to the question: should ICS be withdrawn in patients with COPD? The evidence was appraised using the GRADE (Grading of Recommendations, Assessment, Development and Evaluation) approach and the results were summarised in evidence profiles. The evidence synthesis was discussed and recommendations formulated by a committee with expertise in COPD and guideline methodology.

After considering the balance of desirable and undesirable consequences, quality of evidence, and feasibility and acceptability of interventions, the guideline panel made: 1) conditional recommendation for the withdrawal of ICS in patients with COPD without a history of frequent exacerbations, 2) strong

recommendation not to withdraw ICS in patients with blood eosinophil counts  $\geq 300$  eosinophils- $\mu\text{L}^{-1}$  and 3) strong recommendation to treat with one or two long-acting bronchodilators if ICS are withdrawn.

A conditional recommendation indicates that there was uncertainty about the balance of desirable and undesirable consequences of the intervention, and that well-informed patients may make different choices regarding whether to have or not have the specific intervention.
